# Supplementary material for: Curcumin, Polydatin and Quercetin Synergistic Activity Protects from High-Glucose-Induced Inflammation and Oxidative Stress
Source: MDPI journal article supplement (doi:10.3390/antiox11061037), 2022-05-24
Supplement: s1 [file s1]

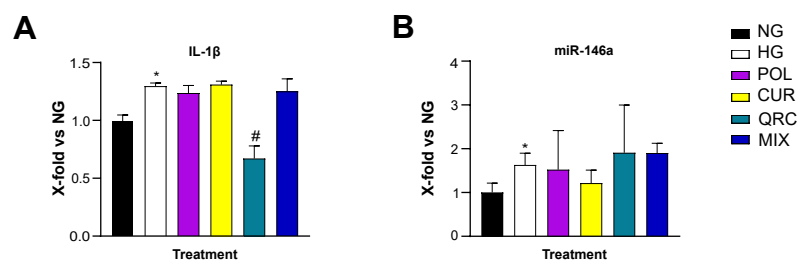

Figure S1. Effect of compound treatment following exposure to high glucose in yHUVCE cells.

Cells were treated for 24h with a single compound or with their combination. Relative mRNA expression of IL-1 $\beta$  (A) and relative miRNA expression of miR-146a (B). Results are expressed as mean  $\pm$ SD from three independent biological replicates. Asterisks (\*) indicate significance versus NG; \*  $p < 0.05$ , \*\*  $p < 0.01$ . NG, normal glucose; HG, high glucose.
